# Supplementary material for: No benefits of statins for sudden cardiac death prevention in patients with heart failure and reduced ejection fraction: A meta-analysis of randomized controlled trials
Source: PubMed Central journal article supplement (PMC5293250; doi:10.1371/journal.pone.0171168), 2017-02-06
Supplement: pone.0171168.s001.pdf [file pone.0171168.s001.pdf]

## S1 : search strategy equations and result.

Databases: Ovid MEDLINE, Embase, and ALL EBM.

Date 28.04.2016

Database(s): Ovid MEDLINE(R) In-Process & Other Non-Indexed Citations and Ovid MEDLINE(R) 1946 to Present

Search Strategy: old final retrieval number : 244

| # | Searches                                                                                                                                                                                                                                                      | Results | Annotations |
|---|---------------------------------------------------------------------------------------------------------------------------------------------------------------------------------------------------------------------------------------------------------------|---------|-------------|
| 1 | exp heart failure/ or (((heart or cardia* or myocardial) adj3 failure*) or (((heart or cardia* adj3 decompensation*) or ((heart or cardia*) adj3 insufficienc*))).mp.                                                                                         | 169277  |             |
| 2 | exp Hypolipidemic Agents/ or (((anti-hyperlipidemic or antihyperlipidemic or antilip?emi* or antilipidemic or hypolip?emic or hypolipidemic or lipid depressing or lipid lowering) adj3 (agent* or drug*)) or (antilipidemics or statin*)).mp.                | 132003  |             |
| 3 | exp hydroxymethyleglutaryl-coenzyme A reductase inhibitor/ or hydroxymethyleglutaryl-co a reductase inhibitor.mp.                                                                                                                                             | 0       |             |
| 4 | hydroxymethyleglutaryl-co a reductase inhibitor.mp. [mp=title, abstract, original title, name of substance word, subject heading word, keyword heading word, protocol supplementary concept word, rare disease supplementary concept word, unique identifier] | 0       |             |
| 5 | Atorvastatin*.mp. [mp=title, abstract, original title, name of substance word, subject heading word, keyword heading word, protocol supplementary concept word, rare disease supplementary concept word, unique identifier]                                   | 7359    |             |
| 6 | Fluvastatin*.mp. [mp=title, abstract, original title, name of substance word, subject heading word, keyword heading word, protocol supplementary concept word, rare disease supplementary concept word, unique identifier]                                    | 1803    |             |
| 7 | Lovastatin*.mp. [mp=title, abstract, original title, name of substance word, subject heading word, keyword heading word, protocol supplementary concept word, rare disease supplementary concept word, unique identifier]                                     | 5431    |             |
| 8 | Pravastatin*.mp. [mp=title, abstract, original title, name of substance word, subject heading word, keyword heading word, protocol supplementary concept word, rare disease supplementary concept word, unique identifier]                                    | 4382    |             |
| 9 | Rosuvastatin.mp. [mp=title, abstract, original title, name of substance word, subject heading word, keyword heading word, protocol supplementary concept word, rare disease                                                                                   | 2667    |             |

|                                                                                             |         |
|---------------------------------------------------------------------------------------------|---------|
| supplementary concept word, unique identifier]                                              |         |
| Simvastatin*.mp. [mp=title, abstract, original title, name of substance word, subject       |         |
| 10 heading word, keyword heading word, protocol supplementary concept word, rare disease    | 8840    |
| supplementary concept word, unique identifier]                                              |         |
| ((Hydrophilic or lipophilic) adj3 statin*).mp. [mp=title, abstract, original title, name of |         |
| 11 substance word, subject heading word, keyword heading word, protocol supplementary       | 276     |
| concept word, rare disease supplementary concept word, unique identifier]                   |         |
| 12 review.ab.                                                                               | 899434  |
| 13 review.pt.                                                                               | 2100182 |
| 14 meta-analysis.ab.                                                                        | 63429   |
| 15 meta-analysis.pt.                                                                        | 64707   |
| 16 or/12-15                                                                                 | 2479709 |
| 17 letter.pt.                                                                               | 911919  |
| 18 comment.pt.                                                                              | 660179  |
| 19 editorial.pt.                                                                            | 399757  |
| 20 or/17-19                                                                                 | 1473826 |
| 21 16 not 20                                                                                | 2446741 |
| exp Death, Sudden, Cardiac/ or Death, Sudden/ or exp heart arrest/ or (sudden adj3          |         |
| 22 (cardiac or death*).mp. or (cardiovascular adj3 mortality).mp. or ((cardiac or           | 1028465 |
| cardiopulmonary or heart) adj3 arrest*).mp. or exp Mortality/ or mortality.mp. or           |         |
| mortality.fs.                                                                               |         |
| 23 or/2-11                                                                                  | 134476  |
| 24 23 and 1                                                                                 | 1904    |
| 25 24 and 21                                                                                | 551     |
| 26 25 and 22                                                                                | 247     |

## Embase 28042016

Database(s): **Embase** 1974 to 2016 Week 17

Search Strategy: old final retrieval number : 818

| #  | Searches                                                                                                                                                                                                                                       | Results | Annotations |
|----|------------------------------------------------------------------------------------------------------------------------------------------------------------------------------------------------------------------------------------------------|---------|-------------|
| 1  | exp heart failure/ or (((heart or cardia* or myocardial) adj3 failure*) or (((heart or cardia* adj3 decompensation*) or ((heart or cardia*) adj3 insufficienc*))).mp.                                                                          | 412054  |             |
| 2  | exp Hypolipidemic Agents/ or (((anti-hyperlipidemic or antihyperlipidemic or antilip?emi* or antilipidemic or hypolip?emic or hypolipidemic or lipid depressing or lipid lowering) adj3 (agent* or drug*)) or (antilipidemics or statin*)).mp. | 250602  |             |
| 3  | exp hydroxymethyleglutaryl-coenzyme A reductase inhibitor/ or hydroxymethyleglutaryl-co a reductase inhibitor.mp.                                                                                                                              | 0       |             |
| 4  | hydroxymethyleglutaryl-co a reductase inhibitor.mp.                                                                                                                                                                                            | 0       |             |
| 5  | atorvastatin*.mp.                                                                                                                                                                                                                              | 29231   |             |
| 6  | fluvastatin*.mp.                                                                                                                                                                                                                               | 2323    |             |
| 7  | lovastatin*.mp.                                                                                                                                                                                                                                | 4614    |             |
| 8  | pravastatin*.mp.                                                                                                                                                                                                                               | 17779   |             |
| 9  | Rosuvastatin.mp.                                                                                                                                                                                                                               | 10810   |             |
| 10 | simvastatin*.mp.                                                                                                                                                                                                                               | 32057   |             |
| 11 | ((Hydrophilic or lipophilic) adj3 statin*).mp.                                                                                                                                                                                                 | 435     |             |
| 12 | meta-analy:.mp.                                                                                                                                                                                                                                | 169859  |             |
| 13 | search:.tw.                                                                                                                                                                                                                                    | 368568  |             |
| 14 | review.pt.                                                                                                                                                                                                                                     | 2153932 |             |
| 15 | or/12-14                                                                                                                                                                                                                                       | 2502548 |             |
| 16 | exp Sudden Cardiac Death/ or Sudden Death/ or exp heart arrest/ or (sudden adj3 (cardiac or death*)).mp. or (cardiovascular adj3 mortality).mp. or ((cardiac or cardiopulmonary or heart) adj3 arrest*).mp. or Cardiovascular Mortality/       | 175812  |             |
| 17 | or/2-11                                                                                                                                                                                                                                        | 251435  |             |
| 18 | 17 and 1                                                                                                                                                                                                                                       | 15072   |             |
| 19 | 18 and 15                                                                                                                                                                                                                                      | 4427    |             |
| 20 | 19 and 16                                                                                                                                                                                                                                      | 835     |             |

All EBM 28042016

Database(s): **EBM Reviews - Cochrane Database of Systematic Reviews** 2005 to April 27, 2016, **EBM Reviews - ACP Journal Club** 1991 to April 2016, **EBM Reviews - Database of Abstracts of Reviews of Effects** 1st Quarter 2016, **EBM Reviews - Cochrane Central Register of Controlled Trials** March 2016, **EBM Reviews - Cochrane Methodology Register** 3rd Quarter 2012, **EBM Reviews - Health Technology Assessment** 1st Quarter 2016, **EBM Reviews - NHS Economic Evaluation Database** 1st Quarter 2016

Search Strategy: old final retrieval number : 82

| #  | Searches                                                                                                                                                                                                                                       | Results | Annotations |
|----|------------------------------------------------------------------------------------------------------------------------------------------------------------------------------------------------------------------------------------------------|---------|-------------|
| 1  | exp heart failure/ or (((heart or cardia* or myocardial) adj3 failure*) or (((heart or cardia* adj3 decompensation*) or ((heart or cardia*) adj3 insufficienc*))) .mp.                                                                         | 17242   |             |
| 2  | exp Hypolipidemic Agents/ or (((anti-hyperlipidemic or antihyperlipidemic or antilip?emi* or antilipidemic or hypolip?emic or hypolipidemic or lipid depressing or lipid lowering) adj3 (agent* or drug*)) or (antilipidemics or statin*)).mp. | 12344   |             |
| 3  | exp hydroxymethyleglutaryl-coenzyme A reductase inhibitor/ or hydroxymethyleglutaryl-co a reductase inhibitor.mp.                                                                                                                              | 0       |             |
| 4  | hydroxymethyleglutaryl-co a reductase inhibitor.mp. [mp=ti, ab, tx, kw, ct, ot, sh, hw]                                                                                                                                                        | 0       |             |
| 5  | Atorvastatin*.mp. [mp=ti, ab, tx, kw, ct, ot, sh, hw]                                                                                                                                                                                          | 3360    |             |
| 6  | Fluvastatin*.mp. [mp=ti, ab, tx, kw, ct, ot, sh, hw]                                                                                                                                                                                           | 651     |             |
| 7  | Lovastatin*.mp. [mp=ti, ab, tx, kw, ct, ot, sh, hw]                                                                                                                                                                                            | 955     |             |
| 8  | Pravastatin*.mp. [mp=ti, ab, tx, kw, ct, ot, sh, hw]                                                                                                                                                                                           | 1740    |             |
| 9  | Rosuvastatin.mp. [mp=ti, ab, tx, kw, ct, ot, sh, hw]                                                                                                                                                                                           | 1234    |             |
| 10 | Simvastatin*.mp. [mp=ti, ab, tx, kw, ct, ot, sh, hw]                                                                                                                                                                                           | 2753    |             |
| 11 | ((Hydrophilic or lipophilic) adj3 statin*).mp. [mp=ti, ab, tx, kw, ct, ot, sh, hw]                                                                                                                                                             | 52      |             |
| 12 | review.ab.                                                                                                                                                                                                                                     | 19697   |             |
| 13 | review.pt.                                                                                                                                                                                                                                     | 2559    |             |
| 14 | meta-analysis.ab.                                                                                                                                                                                                                              | 5025    |             |
| 15 | meta-analysis.pt.                                                                                                                                                                                                                              | 560     |             |
| 16 | or/12-15                                                                                                                                                                                                                                       | 24845   |             |
| 17 | letter.pt.                                                                                                                                                                                                                                     | 5894    |             |
| 18 | comment.pt.                                                                                                                                                                                                                                    | 1837    |             |

|                                                                                                 |       |
|-------------------------------------------------------------------------------------------------|-------|
| 19 editorial.pt.                                                                                | 342   |
| 20 or/17-19                                                                                     | 6669  |
| 21 16 not 20                                                                                    | 24807 |
| exp Death, Sudden, Cardiac/ or Death, Sudden/ or exp heart arrest/ or (sudden adj3              |       |
| 22 (cardiac or death*).mp. or (cardiovascular adj3 mortality).mp. or ((cardiac or               | 55263 |
| cardiopulmonary or heart) adj3 arrest*).mp. or exp Mortality/ or mortality.mp. or mortality.fs. |       |
| 23 or/2-11                                                                                      | 14816 |
| 24 23 and 1                                                                                     | 661   |
| 25 24 and 21                                                                                    | 102   |
| 26 25 and 22                                                                                    | 82    |
